# Supplementary material
Source: MDPI journal article supplement (https://www.mdpi.com/1424-8247/16/8/1185)

Original Images for Blots/Gels

Supplementary Figure S1. Original photographs for the blots of each protein marker of Figure 2(C-E).

Figure 2

(C)

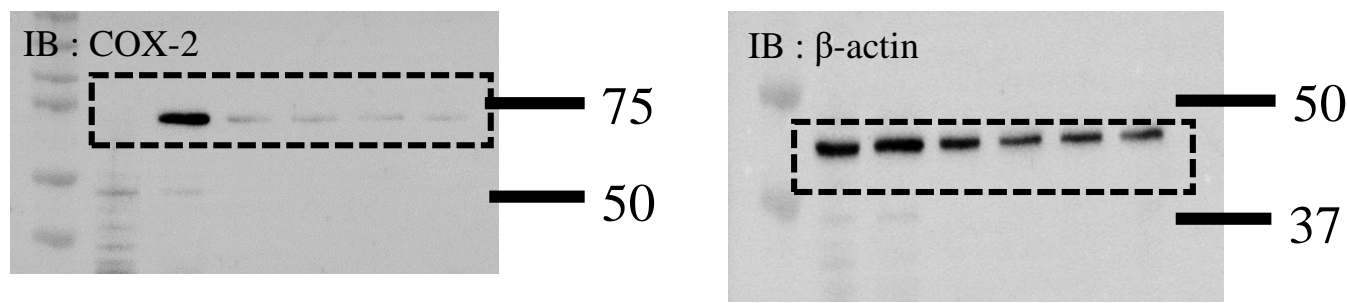

(D)

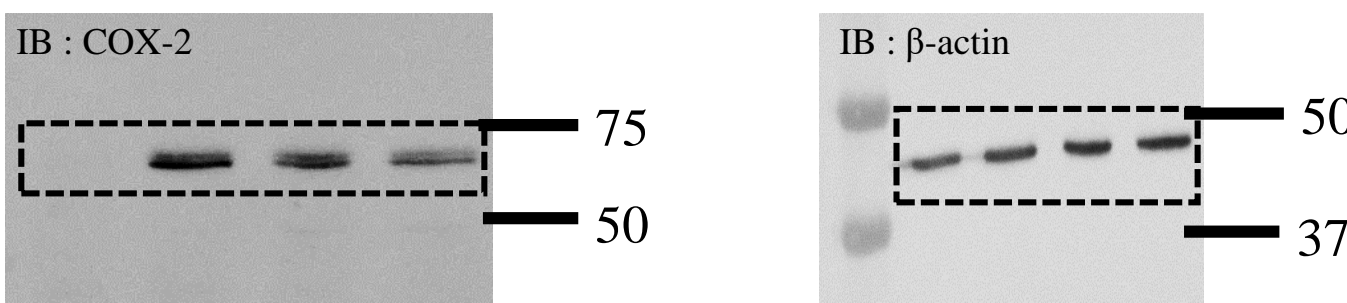

(E)

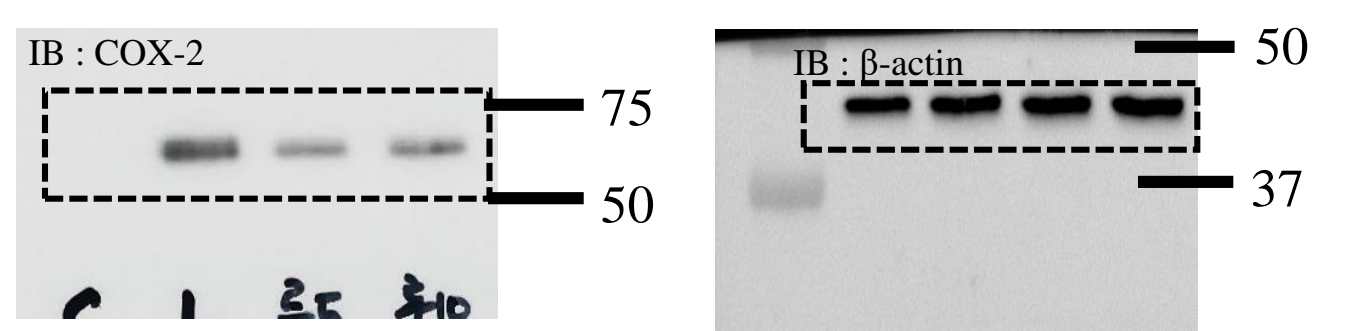

# Original Images for Blots/Gels

Supplementary Figure S2. Original photographs for the blots of each protein marker of Figure 3(A-E).

**Figure 3**

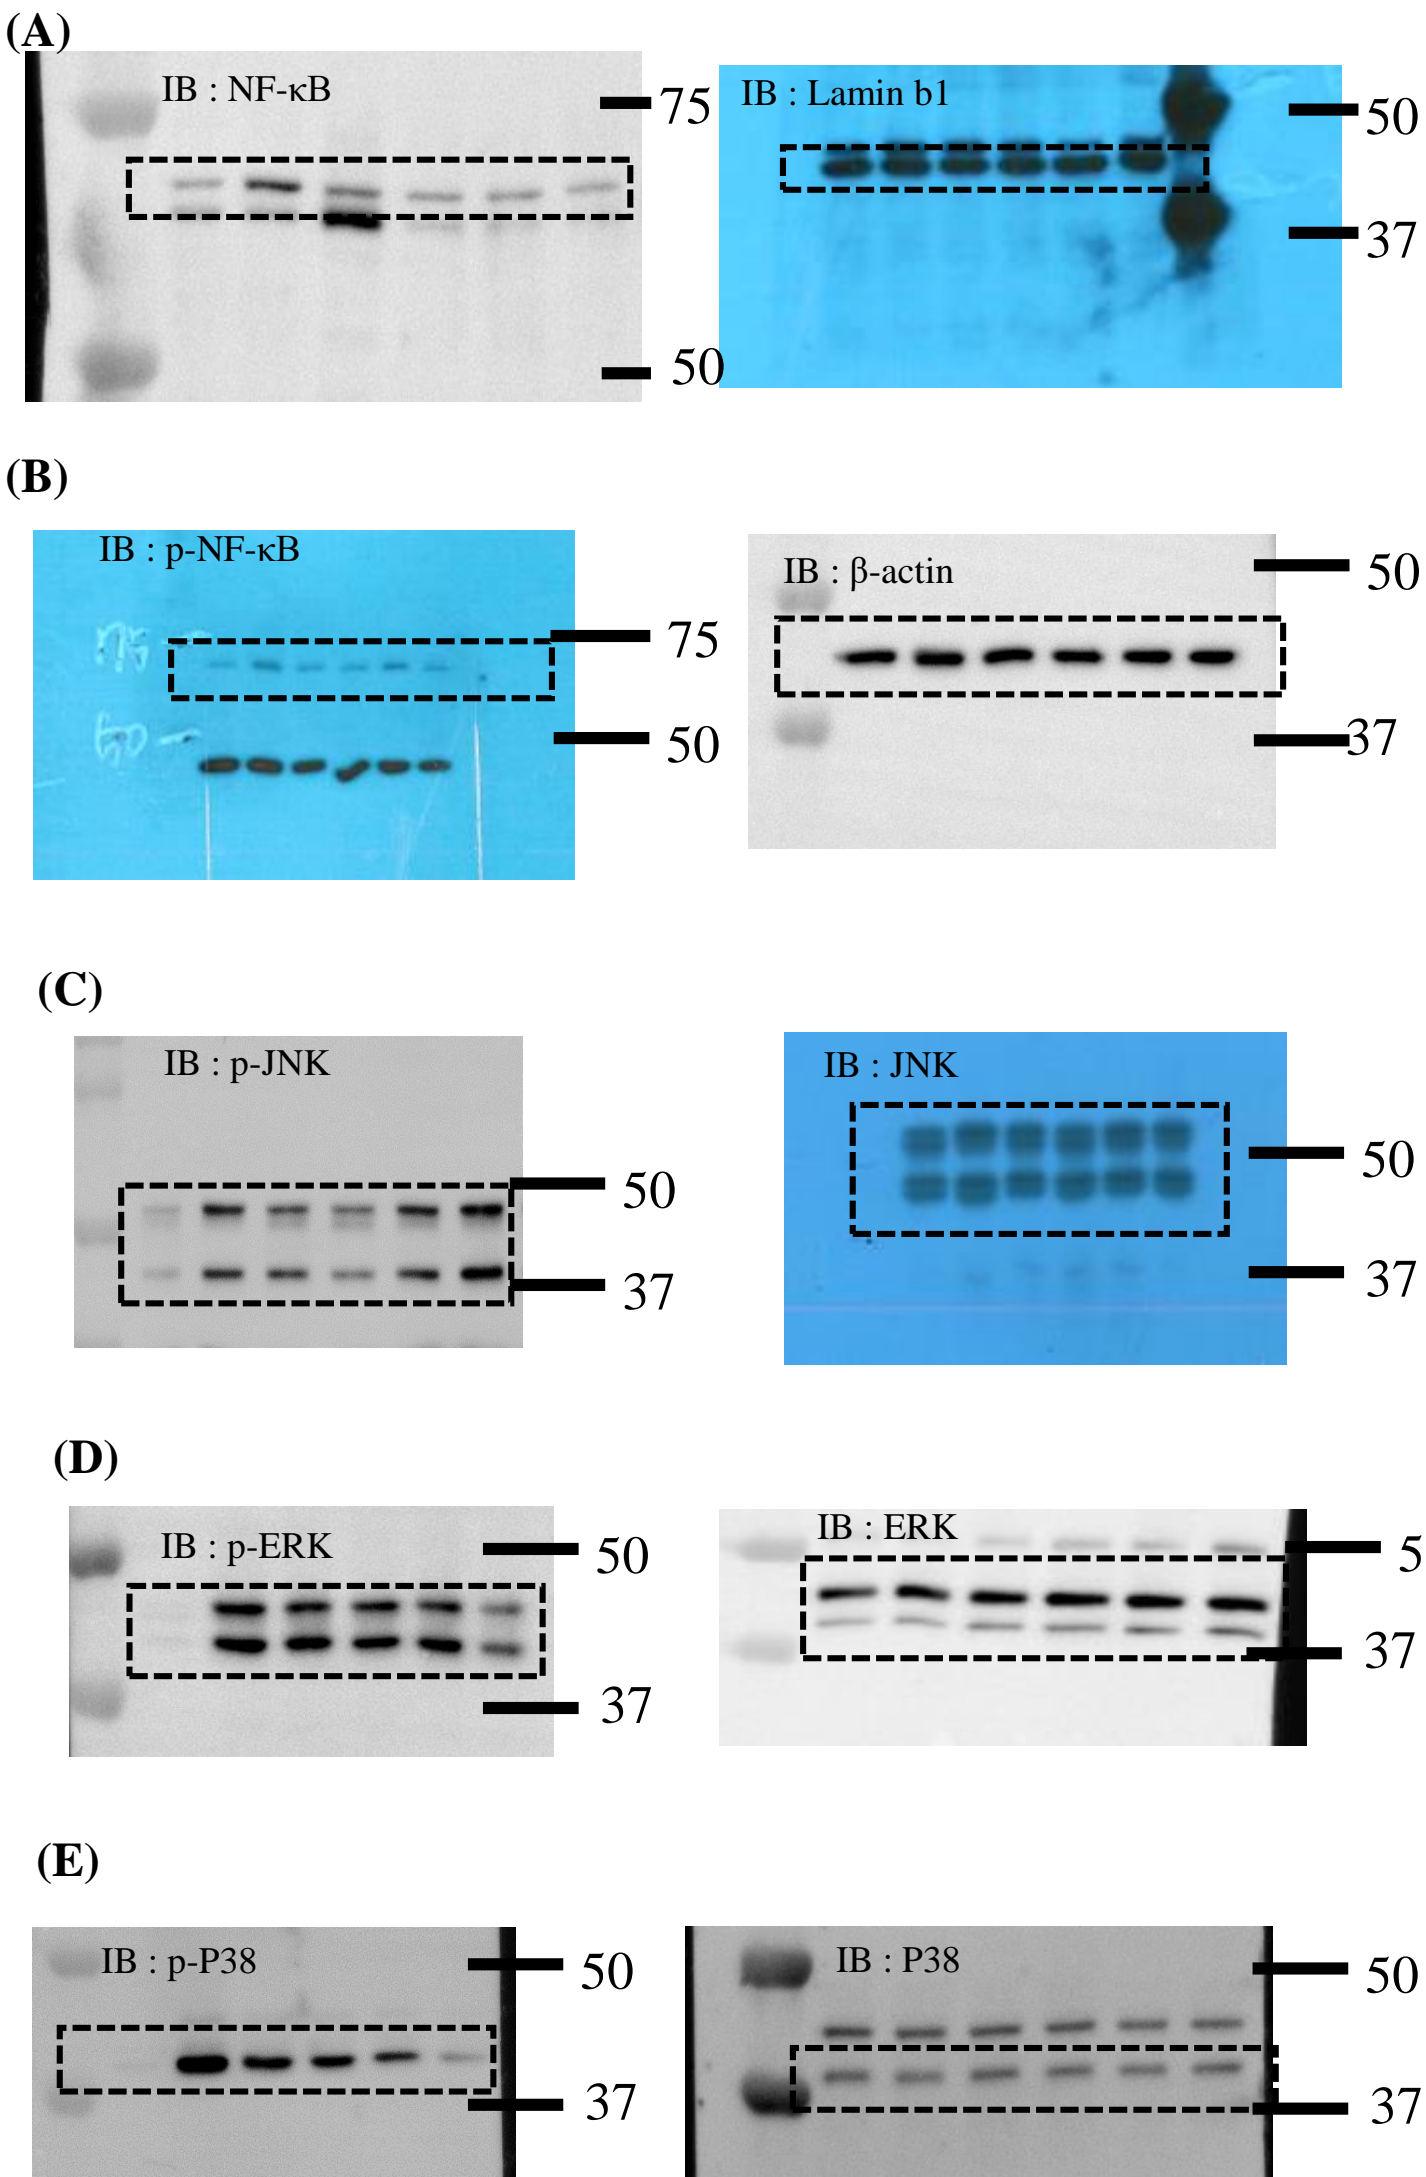

Supplement: s1 [file s1]
